# Supplementary material for: The Influence of Role Models on the Sedentary Behaviour Patterns of Primary School-Aged Children and Associations with Psychosocial Aspects of Health
Source: MDPI journal article supplement (doi:10.3390/ijerph17155345), 2020-07-24
Supplement: s1 [file s1]

**Table S1:** Sociodemographic of children.

|                              | All<br><i>n</i> = 83 | Boys<br><i>n</i> = 35 | Girls<br><i>n</i> = 48 |
|------------------------------|----------------------|-----------------------|------------------------|
| <b>Racial background</b>     |                      |                       |                        |
| White                        | 99%                  | 96%                   | 100%                   |
| Indian                       | 1%                   | 4%                    | 0%                     |
| <b>Location</b>              |                      |                       |                        |
| Donegal (Ireland)            | 51%                  | 50%                   | 51%                    |
| Londonderry (UK)             | 49%                  | 50%                   | 49%                    |
| <b>Family unit</b>           |                      |                       |                        |
| 2 parents                    | 82%                  | 82%                   | 81%                    |
| 1 parent                     | 17%                  | 18%                   | 16%                    |
| other                        | 1%                   | 0%                    | 2%                     |
| <b>Father's Education</b>    |                      |                       |                        |
| Primary                      | 9%                   | 0%                    | 14%                    |
| GCSE or Junior Cert*         | 31%                  | 39%                   | 26%                    |
| A-Level or Leaving Cert*     | 20%                  | 21%                   | 19%                    |
| HND or Certificate*          | 10%                  | 11%                   | 9%                     |
| Degree                       | 14%                  | 14%                   | 14%                    |
| Postgraduate                 | 15%                  | 14%                   | 16%                    |
| N/A                          | 2%                   | 0%                    | 2%                     |
| <b>Mother's Education</b>    |                      |                       |                        |
| Primary                      | 6%                   | 7%                    | 5%                     |
| GCSE or Junior Cert*         | 24%                  | 18%                   | 29%                    |
| A-Level or Leaving Cert*     | 14%                  | 14%                   | 14%                    |
| HND or Certificate*          | 13%                  | 18%                   | 10%                    |
| Degree                       | 20%                  | 32%                   | 12%                    |
| Postgraduate                 | 20%                  | 11%                   | 26%                    |
| N/A                          | 2%                   | 0%                    | 5%                     |
| <b>Work Status of Father</b> |                      |                       |                        |
| Employed full-time           | 67%                  | 59%                   | 71%                    |
| Employed part-time           | 9%                   | 7%                    | 10%                    |
| Student                      | 1%                   | 4%                    | 0%                     |
| At home with children        | 4%                   | 7%                    | 2%                     |
| Unemployed                   | 7%                   | 4%                    | 10%                    |
| Not applicable               | 3%                   | 7%                    | 0%                     |
| Other                        | 6%                   | 11%                   | 2%                     |
| Prefer not to answer         | 3%                   | 0%                    | 5%                     |
| <b>Work Status of Mother</b> |                      |                       |                        |
| Employed full-time           | 32%                  | 41%                   | 26%                    |
| Employed part-time           | 25%                  | 22%                   | 26%                    |
| Student                      | 4%                   | 4%                    | 5%                     |
| At home with children        | 25%                  | 19%                   | 29%                    |
| Unemployed                   | 6%                   | 4%                    | 7%                     |
| Not applicable               | 4%                   | 4%                    | 5%                     |
| Other                        | 3%                   | 7%                    | 0%                     |
| Prefer not to answer         | 1%                   | 0%                    | 2%                     |

**Table S2.** Scores for psychosocial variables by gender and BMI category

| <b>Variable</b> | <b>Rosenberg<br/>Self-Esteem<br/>Scale</b> | <b>Strengths &amp;<br/>Difficulties<br/>Questionnaire</b> |
|-----------------|--------------------------------------------|-----------------------------------------------------------|
| Gender (all)    | 16.6 (2.0)                                 | 17.5 (4.7)                                                |
| Boys            | 16.9 (1.9)                                 | 17.9 (5.4)                                                |
| Girls           | 16.4 (2.2)                                 | 17.3 (4.1)                                                |
| BMI category    |                                            |                                                           |
| Thin            | 17.3 (2.2)                                 | 14.1 (3.3)                                                |
| Average         | 16.9 (2.0)                                 | 16.7 (4.9)                                                |
| Overweight      | 16.4 (2.3)                                 | 19.2 (4.8)                                                |
| Obese           | 16.2 (1.3)                                 | 19.4 (4.1)                                                |

Values are means (SD).

**Table S3.** Proportion of sample scoring in each psychosocial category.

| <b>Variable</b> | <b>All (%)</b> | <b>Boys (%)</b> | <b>Girls (%)</b> |
|-----------------|----------------|-----------------|------------------|
| <b>RSES</b>     |                |                 |                  |
| Low (<15)       | 23.0           | 24.2            | 5.9              |
| Normal (15-25)  | 44.6           | 45.5            | 94.1             |
| High (26-30)    | 32.4           | 30.3            | 0                |
| <b>SDQ</b>      |                |                 |                  |
| Normal (low)    | 23.0           | 24.2            | 22.0             |
| Borderline      | 44.6           | 45.5            | 43.9             |
| Abnormal (high) | 32.4           | 30.3            | 34.1             |

Values are means (SD) or percentages. RSES = Rosenberg Self-Esteem Scale; SDQ = Strengths and Difficulties Questionnaire
